# Supplementary material for: Delayed Imatinib Treatment for Acute Spinal Cord Injury: Functional Recovery and Serum Biomarkers
Source: PubMed Central journal article supplement — J Neurotrauma. 2015 Nov 1;32(21):1645–57. doi: 10.1089/neu.2014.3863 (PMC4752188; doi:10.1089/neu.2014.3863), 2015-11-01
Supplement: Supp_Fig7.pdf [file Supp_Fig7.pdf]

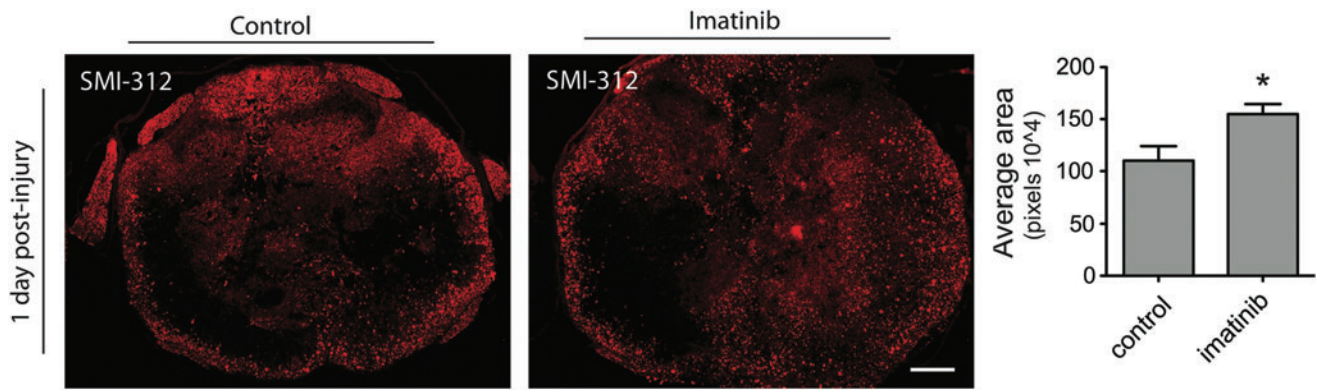

**SUPPLEMENTARY FIG. 7.** Early axon rescue with imatinib. Representative pictures with quantification of SMI-312 (pan-axonal marker) area of immunoreactivity at the injury site of the spinal cord at 1 d post-injury ( $n = 7/\text{group}$ ). Scale bar = 300  $\mu\text{m}$ . Data presented as the mean  $\pm$  standard error of the mean. \* $p < 0.05$ .
